# Supplementary material for: A virtual biopsy study of microsatellite instability in gastric cancer based on deep learning radiomics
Source: Springer Nature journal article supplement (doi:10.1186/s13244-023-01438-1), 2023-06-07
Supplement: MOESM1 [file 25460080]

**A virtual biopsy study of microsatellite instability in gastric cancer  
based on deep learning radiomics**

**Supplementary Table 1.** Clinical baseline data indicators.

| <b>Baseline clinicopathological data</b>          | age                        | gender             | clinical T stage   | tumor location                          | Bowman type                                | degree of differentiation                 | MSI status                  |
|---------------------------------------------------|----------------------------|--------------------|--------------------|-----------------------------------------|--------------------------------------------|-------------------------------------------|-----------------------------|
|                                                   | <b>oncological markers</b> |                    |                    | <b>nutritional inflammatory markers</b> |                                            |                                           |                             |
| <b>Laboratory testing indicators (thresholds)</b> | CEA<br>(3.4ng/ml)          | AFP<br>(7.02ng/ml) | CA-199<br>(39u/ml) | Albumin<br>(35g/l)                      | neutrophil counts<br>( $3.2 \times 10^9$ ) | Lymphocyte count<br>( $0.6 \times 10^9$ ) | Neutrophil lymphocyte ratio |

**Supplementary Table 2.** CT scanner parameters.

| <b>Scanner</b>                                                   | Tube voltage<br>(kV) | Tube current<br>(mAs) | matrix  | Pitch<br>(mm) | Rotation time(s) | section thickness<br>(mm) | Detector collimation<br>(mm) |
|------------------------------------------------------------------|----------------------|-----------------------|---------|---------------|------------------|---------------------------|------------------------------|
| 64-slice Multislice CT Scanner<br>(GECT 670; GE medical systems) | 120                  | 220                   | 512x512 | 1.375         | 0.5              | 5.00                      | 64x0.625                     |

CT, computed tomography.
